# Supplementary material for: Real-world nudging, pricing, and mobile physical activity coaching was insufficient to improve lifestyle behaviours and cardiometabolic health: the Supreme Nudge parallel cluster-randomised controlled supermarket trial
Source: Springer Nature journal article supplement (doi:10.1186/s12916-024-03268-4), 2024-02-02
Supplement: MOESM1 [file 26693796]

**Real-world nudging, pricing and mobile physical activity coaching was insufficient to improve lifestyle behaviours and cardiometabolic health: the Supreme Nudge parallel cluster-randomised controlled supermarket trial**

**Supplementary tables**

*Josine M Stuber, et al*

|                                                                                                                                                                                                        |    |
|--------------------------------------------------------------------------------------------------------------------------------------------------------------------------------------------------------|----|
| Table S1. Available number and type of healthy and unhealthy products <sup>a</sup> per food group on average across participating supermarkets (n=12)...                                               | 2  |
| Table S2. Intervention dosage of pricing strategies across food groups over the trial period. ....                                                                                                     | 4  |
| Table S3. Individual-level outcomes and their measurement methods.....                                                                                                                                 | 5  |
| Table S4. Population characteristics and baseline measurements of participants of the mobile coaching app intervention in the Supreme Nudge trial (n=233), stratified by mobile coaching app arm. .... | 6  |
| Table S5. Descriptive statistics of nudge appreciation and nudge awareness during the last follow-up measurement at month 6 or month 12 (n=332).....                                                   | 7  |
| Table S6. Descriptive statistics of medication use per time point (n=361), stratified by trial arm.....                                                                                                | 8  |
| Table S7. Descriptive statistics per time point of the diet quality (Dutch Healthy Diet 2015 index) scores per food group (n=361), stratified by trial arm. ....                                       | 9  |
| Table S8. Descriptive statistics per time point (blocks of four weeks) of the total percentage of healthier food purchasing from different food groups (n=217), stratified by trial arm. ....          | 11 |
| Table S9. Average (mean (SD)) pre-intervention and post-intervention sales per week for all intervention and all control supermarkets for each supermarket-level outcome (n=12).....                   | 13 |

Table S1. Available number and type of healthy and unhealthy products<sup>a</sup> per food group on average across participating supermarkets (n=12).

|                                           | Healthy products <sup>b</sup>                                                                                                                                 | Unhealthy or neutral products                                                                                                                                                                                 |
|-------------------------------------------|---------------------------------------------------------------------------------------------------------------------------------------------------------------|---------------------------------------------------------------------------------------------------------------------------------------------------------------------------------------------------------------|
| <b>All foods and beverages (n≈12,641)</b> | n≈2,368 (18.7% of all products)                                                                                                                               | n≈10,273                                                                                                                                                                                                      |
| <b>Fruits (n≈241)</b>                     | Fresh, pre-cut and frozen fruits, canned fruits, apple sauce (n≈180; 75% of all healthy fruits)                                                               | Canned fruits with added sugar, apple sauce with added sugar, fruit puree with added sugar (n≈61)                                                                                                             |
| <b>Vegetables (n≈643)</b>                 | Fresh, pre-cut and frozen vegetables, fresh herbs, canned vegetables (n≈395; 61% of all healthy vegetables),                                                  | Vegetables with added cream, canned vegetables (salted) (n≈248)                                                                                                                                               |
| <b>Breads (n≈243)</b>                     | Wholegrain bread (n≈88; 36% of all healthy bread)                                                                                                             | White and non-wholegrain brown bread (n≈155)                                                                                                                                                                  |
| <b>Bread substitutes (n≈302)</b>          | Wholegrain crackers, oats, muesli, and breakfast cereals with low added sugar, salt and fat (n≈67; 22% of all healthy bread substitutes)                      | Non-wholegrain crackers, breakfast cereals with added sugar, salt and/or fat, rice crackers, rusk (n≈235)                                                                                                     |
| <b>Potatoes (n≈137)</b>                   | Fresh and/or pre-cut unprocessed potatoes (n≈66; 48% of all healthy potatoes)                                                                                 | Processed potatoes, mashed potato mix (n≈71)                                                                                                                                                                  |
| <b>Pasta and rice (n≈268)</b>             | Wholegrain pasta, rice and wraps (n≈44; 16% of all healthy pasta and rice)                                                                                    | Non-wholegrain (refrigerated) pasta, rice, wraps, couscous (n≈224)                                                                                                                                            |
| <b>Tea and coffee (n≈496)</b>             | Tea bags, filtered coffee products, coffee products with semi-skimmed and skimmed dairy (n≈420; 85% of all healthy tea and coffee)                            | Unfiltered coffee products, tea bags (added sugar) (n≈76), coffee with added sugar or full-fat dairy                                                                                                          |
| <b>Sodas, waters and juices (n≈915)</b>   | Water, flavoured water (unsweetened) (n≈72; 8% of all healthy beverages)                                                                                      | Sodas, energy drinks, fruit juices, lemonade (n≈843)                                                                                                                                                          |
| <b>Cheese (n≈444)</b>                     | Low-fat and low-salt cheeses (n≈66; 15% of all healthy cheese)                                                                                                | High-fat and/or high-salt cheeses (n≈378)                                                                                                                                                                     |
| <b>Milk and yogurt products (n≈680)</b>   | Semi-skimmed and skimmed milk and yogurt products, plant-based dairy products (unsweetened), coffee milk (n≈190; 28% of all healthy milk and yogurt products) | Semi-skimmed and skimmed dairy products (sweetened), full-fat dairy, custard, desserts, pudding, whipped cream, pudding, cooking cream, dairy drinks, chocolate milk, soy-dairy products (sweetened), (n≈490) |
| <b>Meat products (n≈1,024)</b>            | Unprocessed and low-fat meats, plant-based meat substitutes (unsalted), and eggs (n≈102; 10% of all healthy meat products)                                    | Processed and high-fat meats, and plant-based meat substitutes (salted) (n≈922)                                                                                                                               |
| <b>Fish (n≈249)</b>                       | Fresh, frozen, canned and breaded fish (>70% fish) (n≈176; 71% of all healthy fish)                                                                           | Breaded fish (<70% fish), processed fish dishes (n≈73)                                                                                                                                                        |
| <b>Legumes (n≈158)</b>                    | Canned legumes (low salt) (n≈95; 60% of all healthy legumes)                                                                                                  | Canned legumes (high salt) (n≈63)                                                                                                                                                                             |
| <b>Nuts (n≈209)</b>                       | Seeds, nuts, peanuts, natural peanut butter (n≈77; 37% of all healthy nuts)                                                                                   | Nuts, peanuts (salted or sugared), peanut butter (added salt and palm oil) (n≈132)                                                                                                                            |
| <b>Fats (n≈190)</b>                       | Olive oils, sunflower oils, margarines, vegetable oils, frying oils (n≈125; 66% of all healthy fats)                                                          | Butters, baking butters, frying oils, coconut oils, butters, baking butters (n≈65)                                                                                                                            |
| <b>Other foods (n≈2,836)</b>              | Whole-grain flour, yeast, dried herbs/spices, vinegar (n≈204; 7% of all healthy other foods)                                                                  | Ready-to-eat meals, meal salads, pancakes, pizza, canned soup, drinking broth, seasoning products, sauces (refrigerated), fresh dough, bread toppings, spreads, baking mixes, sugar (n≈2,632)                 |
| <b>Savoury snacks (n≈552)</b>             | N/A                                                                                                                                                           | Salty snacks, fried snacks, chips, popcorn, (n≈552)                                                                                                                                                           |

|                                               |     |                                                                                                                          |
|-----------------------------------------------|-----|--------------------------------------------------------------------------------------------------------------------------|
| <b>Sweet snacks</b><br>( <i>n</i> ≈1,822)     | N/A | Cookies, candy, confectionary, chocolate, liquorice, bubble-gum, ice cream (water- and milk based)<br>( <i>n</i> ≈1,822) |
| <b>Alcoholic drinks</b><br>( <i>n</i> ≈1,231) | N/A | All alcoholic drinks ( <i>n</i> ≈1,231)                                                                                  |

<sup>a</sup>Absolute number of products per food group is indicative as the product assortment varies across supermarket locations and is subjected to weekly changes.

<sup>b</sup>Healthy products were classified as those which are recommended within in the Dutch dietary guidelines (Kromhout et al (2016) EJCN).

N = number; N/A = Not applicable.

**Table S2. Intervention dosage of pricing strategies across food groups over the trial period.**

| Food group                      | Price decrease     |                                           |                                           | Price increase     |                                           |                                           |
|---------------------------------|--------------------|-------------------------------------------|-------------------------------------------|--------------------|-------------------------------------------|-------------------------------------------|
|                                 | Weeks targeted (%) | N average products targeted per week -15% | N average products targeted per week -25% | Weeks targeted (%) | N average products targeted per week +10% | N average products targeted per week +15% |
| <b>Fruits</b>                   | 48 (85.7%)         | N/A                                       | 12,3                                      | N/A                | N/A                                       | N/A                                       |
| <b>Vegetables</b>               | 49 (87.5%)         | 12,3<br>(7 weeks)                         | 21,1<br>(49 weeks)                        | 3 (5,4%)           | 19<br>(3 weeks)                           | N/A                                       |
| <b>Breads</b>                   | 31 (55.4%)         | 12.6<br>(25 weeks)                        | 12.7<br>(6 weeks)                         | 25 (44,6%)         | 17.2<br>(25 weeks)                        | N/A                                       |
| <b>Bread substitutes</b>        | 31 (55.4%)         | 16.0<br>(31 weeks)                        | N/A                                       | 33 (58.9%)         | 67.6<br>(33 weeks)                        | N/A                                       |
| <b>Potatoes</b>                 | N/A                | N/A                                       | N/A                                       | N/A                | N/A                                       | N/A                                       |
| <b>Pasta and rice</b>           | 17 (30.4%)         | 12.5<br>(17 weeks)                        | N/A                                       | 17 (30.4%)         | 60.0<br>(17 weeks)                        | N/A                                       |
| <b>Teas and coffees</b>         | 8 (14.3%)          | 99.8<br>(4 weeks)                         | 48.0<br>(4 weeks)                         | 4 (7.1%)           | 5<br>(4 weeks)                            | N/A                                       |
| <b>Sodas, waters and juices</b> | 22 (39.3%)         | 45.7<br>(13 weeks)                        | 24.0<br>(11 weeks)                        | 21 (37.5%)         | 83.5<br>(10 weeks)                        | 93.3<br>(11 weeks)                        |
| <b>Cheeses</b>                  | 12 (21.4%)         | 29.0<br>(12 weeks)                        | N/A                                       | 12 (21.4%)         | 82.7<br>(12 weeks)                        | N/A                                       |
| <b>Milk and yogurt products</b> | 9 (16.1%)          | 28.1<br>(9 weeks)                         | N/A                                       | 16 (28.6%)         | 67.4<br>(9 weeks)                         | 58.1<br>(7 weeks)                         |
| <b>Meats</b>                    | N/A                | N/A                                       | N/A                                       | N/A                | N/A                                       | N/A                                       |
| <b>Fish</b>                     | 20 (35.7%)         | 14.5<br>(8 weeks)                         | 30.1<br>(16 weeks)                        | 8 (14,3%)          | 28.0<br>(8 weeks)                         | N/A                                       |
| <b>Legumes</b>                  | 16 (28.6%)         | N/A                                       | 28.5<br>(16 weeks)                        | N/A                | N/A                                       | N/A                                       |
| <b>Nuts</b>                     | 19 (33.9%)         | 25.9<br>(16 weeks)                        | N/A                                       | 19 (33.9%)         | 38.2<br>(19 weeks)                        | N/A                                       |
| <b>Fats</b>                     | 26 (46.4%)         | 43.8<br>(22 weeks)                        | 29.0<br>(4 weeks)                         | 19 (33.9%)         | 50.6<br>(19 weeks)                        | N/A                                       |
| <b>Other foods</b>              | 4 (7.1%)           | N/A                                       | 9 (4 weeks)                               | 7 (12.5%)          | 9.4<br>(7 weeks)                          | N/A                                       |
| <b>Savoury snacks</b>           | N/A                | N/A                                       | N/A                                       | 11 (19.6%)         | 21.5<br>(11 weeks)                        | N/A                                       |
| <b>Sweet snacks</b>             | N/A                | N/A                                       | N/A                                       | 16 (28.6%)         | 3.5<br>(16 weeks)                         | N/A                                       |
| <b>Alcoholic drinks</b>         | N/A                | N/A                                       | N/A                                       | N/A                | N/A                                       | N/A                                       |

N = number; N/A = Not applicable.

**Table S3. Individual-level outcomes and their measurement methods.**

| Outcomes                                   | Operationalisation                                                                                                                                                                                                                                                  | Measurement method                                                             | Time points                          |
|--------------------------------------------|---------------------------------------------------------------------------------------------------------------------------------------------------------------------------------------------------------------------------------------------------------------------|--------------------------------------------------------------------------------|--------------------------------------|
| <i>Population characteristics</i>          |                                                                                                                                                                                                                                                                     |                                                                                |                                      |
| Age                                        | Age in years at time of study registration.                                                                                                                                                                                                                         | Baseline questionnaire.                                                        | T0.                                  |
| Sex                                        | Male; female.                                                                                                                                                                                                                                                       | Baseline questionnaire.                                                        | T0.                                  |
| Highest completed educational level        | Low educational attainment (no education, primary school); medium educational attainment (secondary educational attainments); high educational attainment (tertiary/higher educational attainments).                                                                | Baseline questionnaire.                                                        | T0.                                  |
| Household size                             | Number of adults; number of children.                                                                                                                                                                                                                               | Baseline questionnaire.                                                        | T0.                                  |
| Smoking status                             | Current smoker; irregular smoker; former smoker; never smoked.                                                                                                                                                                                                      | Baseline questionnaire.                                                        | T0.                                  |
| Medical history                            | Prevalent type 2 diabetes; hypertension; hyperlipidaemia; cardiovascular disease (all: yes, no, do not know).                                                                                                                                                       | Baseline questionnaire.                                                        | T0.                                  |
| Medication use                             | For type 2 diabetes; hypertension; hyperlipidaemia (all: yes, no, do not know).                                                                                                                                                                                     | Baseline questionnaire and follow-up questionnaires.                           | T0, T1, T2, T3.                      |
| <i>Primary outcome</i>                     |                                                                                                                                                                                                                                                                     |                                                                                |                                      |
| Total dietary guideline adherence          | Scored 0 (low adherence) to 150 (high adherence).                                                                                                                                                                                                                   | Short 40-item food frequency questionnaire.                                    | T0, T1, T2, T3.                      |
| <i>Secondary outcomes</i>                  |                                                                                                                                                                                                                                                                     |                                                                                |                                      |
| Cardiometabolic measures                   | HbA1c (mmol/mol); LDL-cholesterol (mmol/L); HDL-cholesterol (mmol/L); total cholesterol (mmol/L); total cholesterol/HDL-ratio; triglycerides (mmol/L); waist circumference (cm).                                                                                    | Ah-home measurements by participants, via a finger prick and a measuring tape. | T0, T2, T3.                          |
| Total percentage healthier food purchasing | Total percentage of healthy product purchases based on the total grams or millilitres purchased per block of four weeks to reflect an average purchasing pattern.                                                                                                   | Supermarket loyalty card.                                                      | Complete study period (weekly data). |
| Step counts                                | Daily step counts extracted from the smartphones' pedometer or accelerometer.                                                                                                                                                                                       | The 'SNapp' step-counter app.                                                  | Complete study period (daily data).  |
| Total customer satisfaction                | Overall customer satisfaction, measured on a 7-point Likert scale (very unsatisfied – very satisfied).                                                                                                                                                              | Baseline questionnaires and all follow-up questionnaires.                      | T0, T1, T2, T3.                      |
| Food decision styles                       | Reflective; habitual; impulsive (for vegetables and for snacks i.e. sweets and cakes), measured on a 7-point Likert scale (strongly disagree – strongly agree).                                                                                                     | Baseline questionnaires and all follow-up questionnaires.                      | T0, T1, T2, T3.                      |
| Nudges and social cognitive factors        | Health goals; healthy shopping; perceived social norm; attractiveness healthy foods, measured on a 7-point Likert scale (strongly disagree – strongly agree)                                                                                                        | Baseline questionnaires and all follow-up questionnaires.                      | T0, T1, T2, T3.                      |
| Acceptance and awareness of nudges         | Nudge appreciation (i.e., “appreciation of help with making healthier choices” measured on a 7-point Likert scale (strongly disagree – strongly agree)), nudge awareness (i.e., noticed any changes in store lay-out: yes/no, if yes: describe changes (open-end)). | Follow-up questionnaire at month 6 or 12.                                      | T0, T1, T2, T3.                      |

N/A = not applicable. Time points = baseline (T0), after 3 months (T1), after 6 months (T2), and after 12 months (T3).

**Table S4. Population characteristics and baseline measurements of participants of the mobile coaching app intervention in the Supreme Nudge trial (n=233), stratified by mobile coaching app arm.**

|                                                      | Intervention (n=114) | Control (n=119) |
|------------------------------------------------------|----------------------|-----------------|
| Age (years), mean ( <i>SD</i> )                      | 55.9 (11.3)          | 57.0 (10.7)     |
| Gender (female) <sup>a</sup> , <i>n</i> (%)          | 84 (73.7)            | 87 (73.1)       |
| Educational level, <i>n</i> (%)                      |                      |                 |
| Low                                                  | 1 (0.9)              | 2 (1.7)         |
| Medium                                               | 65 (57.0)            | 64 (53.8)       |
| High                                                 | 48 (42.1)            | 53 (44.5)       |
| Operating system, <i>n</i> (%)                       |                      |                 |
| Android                                              | 75 (65.8)            | 84 (70.6)       |
| iOS                                                  | 39 (34.2)            | 35 (29.4)       |
| Sensor type <sup>b</sup> , <i>n</i> (%)              |                      |                 |
| Step detector                                        | 8 (7.0)              | 22 (18.5)       |
| Step counter                                         | 105 (92.1)           | 97 (81.5)       |
| Baseline daily step count, median [IQR] <sup>a</sup> | 3356 [3871]          | 3008 [3588]     |

Low educational attainment: no education and primary education; Medium educational attainment: secondary educational attainments; High educational attainment: tertiary educational attainments. <sup>a</sup>n=2 missing values; <sup>b</sup>n=1 missing value.

**Table S5. Descriptive statistics of nudge appreciation and nudge awareness during the last follow-up measurement at month 6 or month 12 (n=332).**

|                                                                  | Control supermarkets<br>(n=176) | Intervention supermarkets<br>(n=156) |
|------------------------------------------------------------------|---------------------------------|--------------------------------------|
| <i>Nudge appreciation, scored 1 (low) to 7 (high), mean (SD)</i> |                                 |                                      |
| Appreciation of help with making healthier choices               | 5.1 (1.7)                       | 4.8 (1.8)                            |
| <i>Noticed changes in store lay-out, n (%)</i>                   |                                 |                                      |
| Yes                                                              | 43 (24.4)                       | 61 (39.1)                            |
| No                                                               | 133 (75.6)                      | 95 (60.9)                            |
| <i>If 'yes' on noticed changes, noticed changes were, n (%)</i>  |                                 |                                      |
| Nudges were perceived to be noticed                              | 5 (11.6)                        | 16 (26.2)                            |
| Other changes were noticed (e.g., store renovation)              | 32 (74.4)                       | 39 (63.9)                            |
| Unclear if nudges were noticed                                   | 6 (14.0)                        | 6 (9.8)                              |
| <i>Perceived noticed nudges, n (%)</i>                           |                                 |                                      |
| Healthy checkout                                                 | 1 (20.0)                        | 9 (56.3)                             |
| Healthy end of aisle promotions                                  | 0 (0.0)                         | 2 (12.5)                             |
| Increased noticeability/findability of healthy products          | 2 (40.0)                        | 2 (12.5)                             |
| Increased fruit and vegetable promotions                         | 1 (20.0)                        | 2 (12.5)                             |
| Healthier shelf arrangement                                      | 1 (20.0)                        | 0 (0.0)                              |
| Aisle baskets with healthy products                              | 0 (0.0)                         | 1 (6.3)                              |

**Table S6. Descriptive statistics of medication use per time point (n=361), stratified by trial arm.**

|                                       | Time point      | Control<br>supermarkets<br>(n=199) | Intervention<br>supermarkets<br>(n=162) |
|---------------------------------------|-----------------|------------------------------------|-----------------------------------------|
| Medication for type 2 diabetes, n (%) | T0              | 14 (7.0%)                          | 8 (4.9%)                                |
|                                       | T1              | 13 (6.5%)                          | 9 (5.6%)                                |
|                                       | T2 <sup>a</sup> | 11 (5.7%)                          | 7 (4.3%)                                |
|                                       | T3 <sup>b</sup> | 10 (7.8%)                          | 7 (7.4%)                                |
| Medication for hypertension, n (%)    | T0              | 37 (18.6%)                         | 34 (21.0%)                              |
|                                       | T1              | 40 (20.1%)                         | 34 (21.0%)                              |
|                                       | T2 <sup>a</sup> | 37 (19.3%)                         | 36 (22.2%)                              |
|                                       | T3 <sup>b</sup> | 33 (25.8%)                         | 22 (23.4%)                              |
| Medication for hyperlipidaemia, n (%) | T0              | 28 (14.1%)                         | 22 (13.6%)                              |
|                                       | T1              | 25 (12.6%)                         | 27 (16.7%)                              |
|                                       | T2 <sup>a</sup> | 27 (14.1%)                         | 28 (17.3%)                              |
|                                       | T3 <sup>b</sup> | 24 (18.8%)                         | 15 (16.0%)                              |

T0 = baseline; T1 = after 3 months; T2 = after 6 months; T3 = after 12 months.

<sup>a</sup>n=7 missing values; <sup>b</sup>n=139 missing values.



**Table S7. Descriptive statistics per time point of the diet quality (Dutch Healthy Diet 2015 index) scores per food group (n=361), stratified by trial arm.**

|                                                                             | Time point      | Control supermarkets<br>(n=199) | Intervention<br>supermarkets<br>(n=162) |
|-----------------------------------------------------------------------------|-----------------|---------------------------------|-----------------------------------------|
| Healthy intake of vegetables (score 0-10), mean (SD)                        | T0              | 6.4 (3.2)                       | 5.9 (3.2)                               |
|                                                                             | T1 <sup>a</sup> | 6.5 (3.2)                       | 6.0 (3.1)                               |
|                                                                             | T2 <sup>b</sup> | 6.2 (3.0)                       | 5.5 (3.0)                               |
|                                                                             | T3 <sup>c</sup> | 5.8 (3.0)                       | 5.3 (3.1)                               |
| Healthy intake of fruits (score 0-10), mean (SD)                            | T0              | 7.0 (3.2)                       | 6.4 (3.4)                               |
|                                                                             | T1 <sup>a</sup> | 7.1 (3.2)                       | 6.8 (3.3)                               |
|                                                                             | T2 <sup>b</sup> | 7.0 (3.2)                       | 6.4 (3.4)                               |
|                                                                             | T3 <sup>c</sup> | 6.9 (3.3)                       | 6.6 (3.3)                               |
| Healthy intake of whole grains (score 0-10), mean (SD)                      | T0              | 7.5 (2.5)                       | 7.4 (2.8)                               |
|                                                                             | T1 <sup>a</sup> | 7.4 (2.9)                       | 7.4 (2.9)                               |
|                                                                             | T2 <sup>b</sup> | 7.7 (2.7)                       | 7.5 (2.9)                               |
|                                                                             | T3 <sup>c</sup> | 8.0 (2.6)                       | 7.1 (3.2)                               |
| Healthy intake of legumes (score 0-10), median [IQR]                        | T0              | 10.0 [7.8]                      | 8.7 [10.0]                              |
|                                                                             | T1 <sup>a</sup> | 10.0 [5.6]                      | 10 [10.0]                               |
|                                                                             | T2 <sup>b</sup> | 8.7 [5.6]                       | 8.7 [10.0]                              |
|                                                                             | T3 <sup>c</sup> | 10.0 [5.6]                      | 10.0 [4.6]                              |
| Healthy intake of nuts (score 0-10), median [IQR]                           | T0              | 5.8 [8.1]                       | 3.9 [8.1]                               |
|                                                                             | T1 <sup>a</sup> | 5.8 [8.1]                       | 2.9 [8.1]                               |
|                                                                             | T2 <sup>b</sup> | 5.8 [8.1]                       | 2.9 [7.7]                               |
|                                                                             | T3 <sup>c</sup> | 6.8 [8.1]                       | 2.9 [9.0]                               |
| Healthy intake of dairy (score 0-10), median [IQR]                          | T0              | 6.0 [6.1]                       | 5.7 [6.8]                               |
|                                                                             | T1 <sup>a</sup> | 5.6 [6.5]                       | 5.4 [5.8]                               |
|                                                                             | T2 <sup>b</sup> | 6.0 [6.4]                       | 5.3 [6.5]                               |
|                                                                             | T3 <sup>c</sup> | 6.4 [6.0]                       | 6.3 [5.3]                               |
| Healthy intake of fish (score 0-10), median [IQR]                           | T0              | 7.5 [7.5]                       | 7.5 [7.5]                               |
|                                                                             | T1 <sup>a</sup> | 7.5 [6.2]                       | 7.5 [7.5]                               |
|                                                                             | T2 <sup>b</sup> | 7.5 [6.2]                       | 7.5 [7.5]                               |
|                                                                             | T3 <sup>c</sup> | 7.5 [6.2]                       | 7.5 [7.5]                               |
| Healthy intake of tea (score 0-10), median [IQR]                            | T0              | 3.3 [9.8]                       | 5.0 [9.8]                               |
|                                                                             | T1 <sup>a</sup> | 5.2 [9.8]                       | 5.2 [9.8]                               |
|                                                                             | T2 <sup>b</sup> | 3.3 [9.8]                       | 5.2 [9.8]                               |
|                                                                             | T3 <sup>c</sup> | 5.2 [9.5]                       | 3.3 [10.0]                              |
| Healthy intake of oils and butter (score 0-10), median [IQR]                | T0              | 10.0 [9.7]                      | 10.0 [9.6]                              |
|                                                                             | T1 <sup>a</sup> | 10.0 [9.7]                      | 10.0 [9.1]                              |
|                                                                             | T2 <sup>b</sup> | 10.0 [9.7]                      | 10.0 [9.7]                              |
|                                                                             | T3 <sup>c</sup> | 10.0 [9.7]                      | 10.0 [8.5]                              |
| Healthy intake of coffee (score 0-10), mean (SD)                            | T0              | 7.4 (2.8)                       | 8.1 (2.6)                               |
|                                                                             | T1 <sup>a</sup> | 7.3 (2.8)                       | 7.9 (2.6)                               |
|                                                                             | T2 <sup>b</sup> | 7.5 (2.7)                       | 7.8 (2.6)                               |
|                                                                             | T3 <sup>c</sup> | 7.3 (2.8)                       | 7.6 (2.7)                               |
| Healthy/limited intake of red meat (score 0-10), mean (SD)                  | T0              | 8.7 (2.8)                       | 9.1 (2.4)                               |
|                                                                             | T1 <sup>a</sup> | 9.3 (2.1)                       | 9.3 (2.2)                               |
|                                                                             | T2 <sup>b</sup> | 9.3 (2.2)                       | 9.2 (2.4)                               |
|                                                                             | T3 <sup>c</sup> | 9.0 (2.5)                       | 9.4 (1.9)                               |
| Healthy/limited intake of processed meat (score 0-10), median [IQR]         | T0              | 5.1 [6.9]                       | 5.8 [5.5]                               |
|                                                                             | T1 <sup>a</sup> | 5.5 [6.0]                       | 6.4 [5.0]                               |
|                                                                             | T2 <sup>b</sup> | 5.1 [7.3]                       | 6.5 [5.0]                               |
|                                                                             | T3 <sup>c</sup> | 5.8 [6.1]                       | 5.9 [5.0]                               |
| Healthy/limited intake of sugar sweetened beverages (score 0-10), mean (SD) | T0              | 8.2 (3.0)                       | 7.9 (3.2)                               |
|                                                                             | T1 <sup>a</sup> | 8.4 (2.8)                       | 8.0 (3.3)                               |
|                                                                             | T2 <sup>b</sup> | 8.4 (2.7)                       | 8.2 (2.9)                               |
|                                                                             | T3 <sup>c</sup> | 8.4 (2.7)                       | 7.9 (3.0)                               |
| Healthy/limited intake of alcoholic beverages (score 0-10), mean (SD)       | T0              | 8.3 (2.9)                       | 7.6 (3.6)                               |
|                                                                             | T1 <sup>a</sup> | 8.2 (3.1)                       | 7.5 (3.7)                               |
|                                                                             | T2 <sup>b</sup> | 8.3 (2.8)                       | 7.9 (3.4)                               |
|                                                                             | T3 <sup>c</sup> | 8.5 (2.6)                       | 8.1 (3.3)                               |

|                                                                    |                 |           |           |
|--------------------------------------------------------------------|-----------------|-----------|-----------|
| Healthy/limited intake of salt (score 0-10), mean (SD)             | T0              | 8.1 (2.1) | 8.4 (2.0) |
|                                                                    | T1 <sup>a</sup> | 8.5 (2.0) | 8.6 (1.8) |
|                                                                    | T2 <sup>b</sup> | 8.3 (2.2) | 8.6 (1.8) |
|                                                                    | T3 <sup>c</sup> | 8.3 (2.2) | 8.6 (1.8) |
| Healthy/limited intake of unhealthy snacks (score 0-10), mean (SD) | T0              | 4.0 (4.2) | 4.1 (4.3) |
|                                                                    | T1 <sup>a</sup> | 4.7 (4.4) | 4.4 (4.3) |
|                                                                    | T2 <sup>b</sup> | 4.7 (4.3) | 4.8 (4.4) |
|                                                                    | T3 <sup>c</sup> | 4.9 (4.4) | 4.6 (4.3) |

T0 = baseline; T1 = after 3 months; T2 = after 6 months; T3 = after 12 months.

<sup>a</sup>n=16 missing values; <sup>b</sup>n=33 missing values; <sup>c</sup>n=148 missing values

Table S8. Descriptive statistics per time point (blocks of four weeks) of the total percentage of healthier food purchasing from different food groups (n=217), stratified by trial arm.

|                                                                                                                    | Time point       | Control supermarkets<br>(n=123) | Intervention<br>supermarkets<br>(n=94) |
|--------------------------------------------------------------------------------------------------------------------|------------------|---------------------------------|----------------------------------------|
| Total percentage of healthy fruits, vegetables, legumes and potato, mean (SD)                                      | T0               | 85.4 (22.0)                     | 82.0 (26.8)                            |
|                                                                                                                    | T1 <sup>b</sup>  | 89.4 (14.3)                     | 88.2 (19.7)                            |
|                                                                                                                    | T2 <sup>c</sup>  | 82.9 (23.9)                     | 84.3 (22.8)                            |
|                                                                                                                    | T3 <sup>d</sup>  | 85.6 (23.0)                     | 86.1 (22.4)                            |
|                                                                                                                    | T4 <sup>e</sup>  | 85.6 (24.0)                     | 86.4 (21.2)                            |
|                                                                                                                    | T5 <sup>f</sup>  | 82.7 (28.3)                     | 88.3 (19.4)                            |
|                                                                                                                    | T6 <sup>g</sup>  | 86.1 (21.9)                     | 81.7 (29.1)                            |
|                                                                                                                    | T7 <sup>h</sup>  | 85.0 (22.9)                     | 84.9 (25.6)                            |
|                                                                                                                    | T8 <sup>i</sup>  | 85.3 (23.1)                     | 83.7 (24.8)                            |
|                                                                                                                    | T9 <sup>j</sup>  | 88.4 (16.6)                     | 75.9 (29.5)                            |
|                                                                                                                    | T10 <sup>k</sup> | 82.7 (24.9)                     | 86.1 (18.4)                            |
|                                                                                                                    | T11 <sup>l</sup> | 84.6 (23.2)                     | 82.3 (19.9)                            |
|                                                                                                                    | T12 <sup>m</sup> | 86.6 (21.9)                     | 77.3 (27.1)                            |
|                                                                                                                    | T13 <sup>n</sup> | 82.3 (29.2)                     | 78.3 (29.6)                            |
| Total percentage of healthy grain products (bread, pasta, rice, bread substitutes, breakfast grains), median [IQR] | T0               | 20.9 [59.7]                     | 25.5 [66.6]                            |
|                                                                                                                    | T1 <sup>b</sup>  | 21.5 [50.0]                     | 31.0 [59.4]                            |
|                                                                                                                    | T2 <sup>c</sup>  | 22.2 [46.1]                     | 27.2 [72.4]                            |
|                                                                                                                    | T3 <sup>d</sup>  | 18.5 [50.0]                     | 29.8 [58.3]                            |
|                                                                                                                    | T4 <sup>e</sup>  | 29.3 [52.2]                     | 20.8 [47.8]                            |
|                                                                                                                    | T5 <sup>f</sup>  | 19.3 [48.7]                     | 21.4 [54.5]                            |
|                                                                                                                    | T6 <sup>g</sup>  | 23.4 [51.8]                     | 0.0 [46.7]                             |
|                                                                                                                    | T7 <sup>h</sup>  | 28.2 [51.7]                     | 13.6 [42.7]                            |
|                                                                                                                    | T8 <sup>i</sup>  | 19.4 [54.1]                     | 6.9 [38.6]                             |
|                                                                                                                    | T9 <sup>j</sup>  | 15.7 [60.0]                     | 0.0 [46.1]                             |
|                                                                                                                    | T10 <sup>k</sup> | 22.6 [57.2]                     | 16.0 [50.9]                            |
|                                                                                                                    | T11 <sup>l</sup> | 20.5 [55.2]                     | 10.2 [50.5]                            |
|                                                                                                                    | T12 <sup>m</sup> | 20.7 [57.8]                     | 25.7 [67.8]                            |
|                                                                                                                    | T13 <sup>n</sup> | 4.2 [47.0]                      | 0.0 [33.4]                             |
| Total percentage of healthy dairy (cheese, yoghurt, milk, desserts), median [IQR]                                  | T0               | 44.1 [40.3]                     | 52.1 [50.3]                            |
|                                                                                                                    | T1 <sup>b</sup>  | 46.3 [38.0]                     | 52.5 [41.9]                            |
|                                                                                                                    | T2 <sup>c</sup>  | 49.7 [36.9]                     | 45.6 [45.2]                            |
|                                                                                                                    | T3 <sup>d</sup>  | 41.9 [44.4]                     | 52.8 [47.6]                            |
|                                                                                                                    | T4 <sup>e</sup>  | 47.8 [36.1]                     | 53.7 [42.9]                            |
|                                                                                                                    | T5 <sup>f</sup>  | 47.4 [50.0]                     | 49.0 [49.7]                            |
|                                                                                                                    | T6 <sup>g</sup>  | 52.3 [39.1]                     | 51.7 [51.6]                            |
|                                                                                                                    | T7 <sup>h</sup>  | 45.1 [41.8]                     | 45.9 [64.4]                            |
|                                                                                                                    | T8 <sup>i</sup>  | 43.1 [42.4]                     | 41.9 [44.9]                            |
|                                                                                                                    | T9 <sup>j</sup>  | 35.7 [49.1]                     | 33.8 [56.1]                            |
|                                                                                                                    | T10 <sup>k</sup> | 36.3 [39.3]                     | 40.5 [51.1]                            |
|                                                                                                                    | T11 <sup>l</sup> | 39.6 [51.3]                     | 41.4 [47.3]                            |
|                                                                                                                    | T12 <sup>m</sup> | 46.3 [39.7]                     | 32.4 [47.7]                            |
|                                                                                                                    | T13 <sup>n</sup> | 44.4 [44.4]                     | 44.2 [52.2]                            |
| Total percentage of healthy fats (fish, nuts, butter and oils), median [IQR]                                       | T0               | 43.1 [100.0]                    | 43.5 [76.1]                            |
|                                                                                                                    | T1 <sup>b</sup>  | 50.2 [82.6]                     | 52.2 [78.6]                            |
|                                                                                                                    | T2 <sup>c</sup>  | 52.0 [85.0]                     | 54.2 [76.6]                            |
|                                                                                                                    | T3 <sup>d</sup>  | 46.5 [81.2]                     | 55.1 [100.0]                           |
|                                                                                                                    | T4 <sup>e</sup>  | 40.0 [91.2]                     | 68.6 [100.0]                           |
|                                                                                                                    | T5 <sup>f</sup>  | 52.2 [86.4]                     | 46.2 [93.1]                            |
|                                                                                                                    | T6 <sup>g</sup>  | 38.1 [73.9]                     | 43.3 [87.1]                            |
|                                                                                                                    | T7 <sup>h</sup>  | 25.6 [73.6]                     | 30.8 [75.0]                            |
|                                                                                                                    | T8 <sup>i</sup>  | 44.4 [73.1]                     | 33.9 [74.3]                            |
|                                                                                                                    | T9 <sup>j</sup>  | 36.0 [73.5]                     | 47.9 [81.8]                            |
|                                                                                                                    | T10 <sup>k</sup> | 46.8 [77.1]                     | 32.1 [75.1]                            |
|                                                                                                                    | T11 <sup>l</sup> | 38.4 [80.1]                     | 45.4 [83.1]                            |
|                                                                                                                    | T12 <sup>m</sup> | 58.3 [100.0]                    | 54.8 [76.5]                            |
|                                                                                                                    | T13 <sup>n</sup> | 31.5 [77.0]                     | 31.5 [76.4]                            |

|                                                                                        |                  |     |        |      |         |
|----------------------------------------------------------------------------------------|------------------|-----|--------|------|---------|
| Total percentage of healthy beverages (soda, water, juices, tea, coffee), median [IQR] | T0               | 0.0 | [15.7] | 0.0  | [25.1]  |
|                                                                                        | T1 <sup>b</sup>  | 3.5 | [28.3] | 7.6  | [50.0]  |
|                                                                                        | T2 <sup>c</sup>  | 3.4 | [37.4] | 3.3  | [58.4]  |
|                                                                                        | T3 <sup>d</sup>  | 0.3 | [13.4] | 1.9  | [34.3]  |
|                                                                                        | T4 <sup>e</sup>  | 2.4 | [50.0] | 2.0  | [26.7]  |
|                                                                                        | T5 <sup>f</sup>  | 2.2 | [24.9] | 0.0  | [35.5]  |
|                                                                                        | T6 <sup>g</sup>  | 2.9 | [33.1] | 0.0  | [28.6]  |
|                                                                                        | T7 <sup>h</sup>  | 0.0 | [15.6] | 0.0  | [36.1]  |
|                                                                                        | T8 <sup>i</sup>  | 2.9 | [20.8] | 3.4  | [73.4]  |
|                                                                                        | T9 <sup>j</sup>  | 2.3 | [47.1] | 0.0  | [53.2]  |
|                                                                                        | T10 <sup>k</sup> | 1.3 | [19.7] | 0.0  | [48.2]  |
|                                                                                        | T11 <sup>l</sup> | 1.7 | [56.9] | 16.1 | [100.0] |
|                                                                                        | T12 <sup>m</sup> | 0.3 | [58.0] | 1.7  | [52.2]  |
|                                                                                        | T13 <sup>n</sup> | 0.0 | [35.4] | 0.0  | [33.3]  |
| Total percentage of snacks of all purchases (sweet and savoury snacks), median [IQR]   | T0               | 4.0 | [5.6]  | 4.8  | [7.0]   |
|                                                                                        | T1 <sup>b</sup>  | 5.2 | [5.2]  | 5.0  | [7.6]   |
|                                                                                        | T2 <sup>c</sup>  | 5.2 | [6.0]  | 5.1  | [5.7]   |
|                                                                                        | T3 <sup>d</sup>  | 5.2 | [5.3]  | 4.6  | [5.9]   |
|                                                                                        | T4 <sup>e</sup>  | 5.1 | [6.0]  | 5.0  | [7.4]   |
|                                                                                        | T5 <sup>f</sup>  | 4.0 | [6.2]  | 4.6  | [5.1]   |
|                                                                                        | T6 <sup>g</sup>  | 4.9 | [5.6]  | 4.3  | [7.3]   |
|                                                                                        | T7 <sup>h</sup>  | 5.7 | [6.6]  | 5.6  | [7.0]   |
|                                                                                        | T8 <sup>i</sup>  | 5.6 | [5.0]  | 5.7  | [6.5]   |
|                                                                                        | T9 <sup>j</sup>  | 4.1 | [7.1]  | 5.5  | [4.4]   |
|                                                                                        | T10 <sup>k</sup> | 4.9 | [6.2]  | 3.7  | [4.3]   |
|                                                                                        | T11 <sup>l</sup> | 4.6 | [7.0]  | 4.0  | [6.0]   |
|                                                                                        | T12 <sup>m</sup> | 4.9 | [6.6]  | 4.2  | [5.1]   |
|                                                                                        | T13 <sup>n</sup> | 5.4 | [7.5]  | 4.0  | [6.2]   |

T0-T13 reflect time points in blocks of four weeks, where T0 is a pre-intervention baseline period and T1-13 the intervention period. <sup>a</sup>n=138 missing values; <sup>b</sup>n=7 missing values; <sup>c</sup>n=10 missing values; <sup>d</sup>n=15 missing values; <sup>e</sup>n=29 missing values; <sup>f</sup>n=30 missing values; <sup>g</sup>n=37 missing values; <sup>h</sup>n=56 missing values; <sup>i</sup>n=99 missing values; <sup>j</sup>n=98 missing values; <sup>k</sup>n=101 missing values; <sup>l</sup>n=103 missing values; <sup>m</sup>n=95 missing values; <sup>n</sup>n=107 missing values.

**Table S9. Average (mean (SD)) pre-intervention and post-intervention sales per week for all intervention and all control supermarkets for each supermarket-level outcome (n=12).**

|                                                        | Control supermarkets   |                         | Intervention supermarkets |                         |
|--------------------------------------------------------|------------------------|-------------------------|---------------------------|-------------------------|
|                                                        | Pre-intervention sales | Post-intervention sales | Pre-intervention sales    | Post-intervention sales |
| Total percentage of healthy product sales              | 27.4 (2.5)             | 27.6 (2.6)              | 27.5 (2.1)                | 27.5 (2.0)              |
| <i>Percentage sales within various food groups:</i>    |                        |                         |                           |                         |
| Healthy fruits, vegetables, legumes and nuts sales     | 82.1 (3.1)             | 82.3 (2.6)              | 82.7 (3.9)                | 82.4 (3.2)              |
| Healthy grain product sales                            | 20.6 (3.2)             | 20.3 (3.3)              | 20.9 (2.6)                | 21.1 (2.8)              |
| Healthy milk and yogurt products sales                 | 35.6 (4.3)             | 36.0 (4.6)              | 36.2 (4.9)                | 35.9 (5.1)              |
| Healthy cheese sales                                   | 16.9 (4.2)             | 18.2 (4.3)              | 18.2 (4.2)                | 19.9 (4.4)              |
| Healthy meat products, meat substitutes and egg sales  | 18.4 (3.6)             | 14.4 (3.6)              | 20.2 (3.4)                | 15.5 (3.7)              |
| Healthy fish sales                                     | 90.9 (2.7)             | 94.1 (2.7)              | 90.9 (3.4)                | 93.9 (3.8)              |
| Healthy oils, fats and herbs and spices sales          | 25.8 (4.1)             | 25.7 (3.9)              | 25.5 (4.4)                | 25.9 (4.4)              |
| Healthy non-alcoholic beverage sales                   | 20.7 (5.3)             | 21.4 (6.2)              | 21.8 (4.8)                | 21.3 (4.9)              |
| Healthy product sales from remaining food products     | 14.4 (1.9)             | 14.5 (1.8)              | 13.7 (1.4)                | 13.7 (1.3)              |
| Unhealthy sweet and savoury snack sales of total sales | 12.5 (1.7)             | 12.1 (1.3)              | 12.7 (1.2)                | 11.8 (1.0)              |
| Total sales revenue (Euros)                            | 68062.6<br>(13823.4)   | 72699.9<br>(23419.3)    | 66498.5<br>(15623.2)      | 59064.5<br>(15942.4)    |
